# Supplementary material for: Genome-wide data reveal bi-direction and asymmetrical hybridization origin of a fern species Microlepia matthewii
Source: PubMed Central journal article supplement (PMC11260791; doi:10.3389/fpls.2024.1392990), 2024-07-08

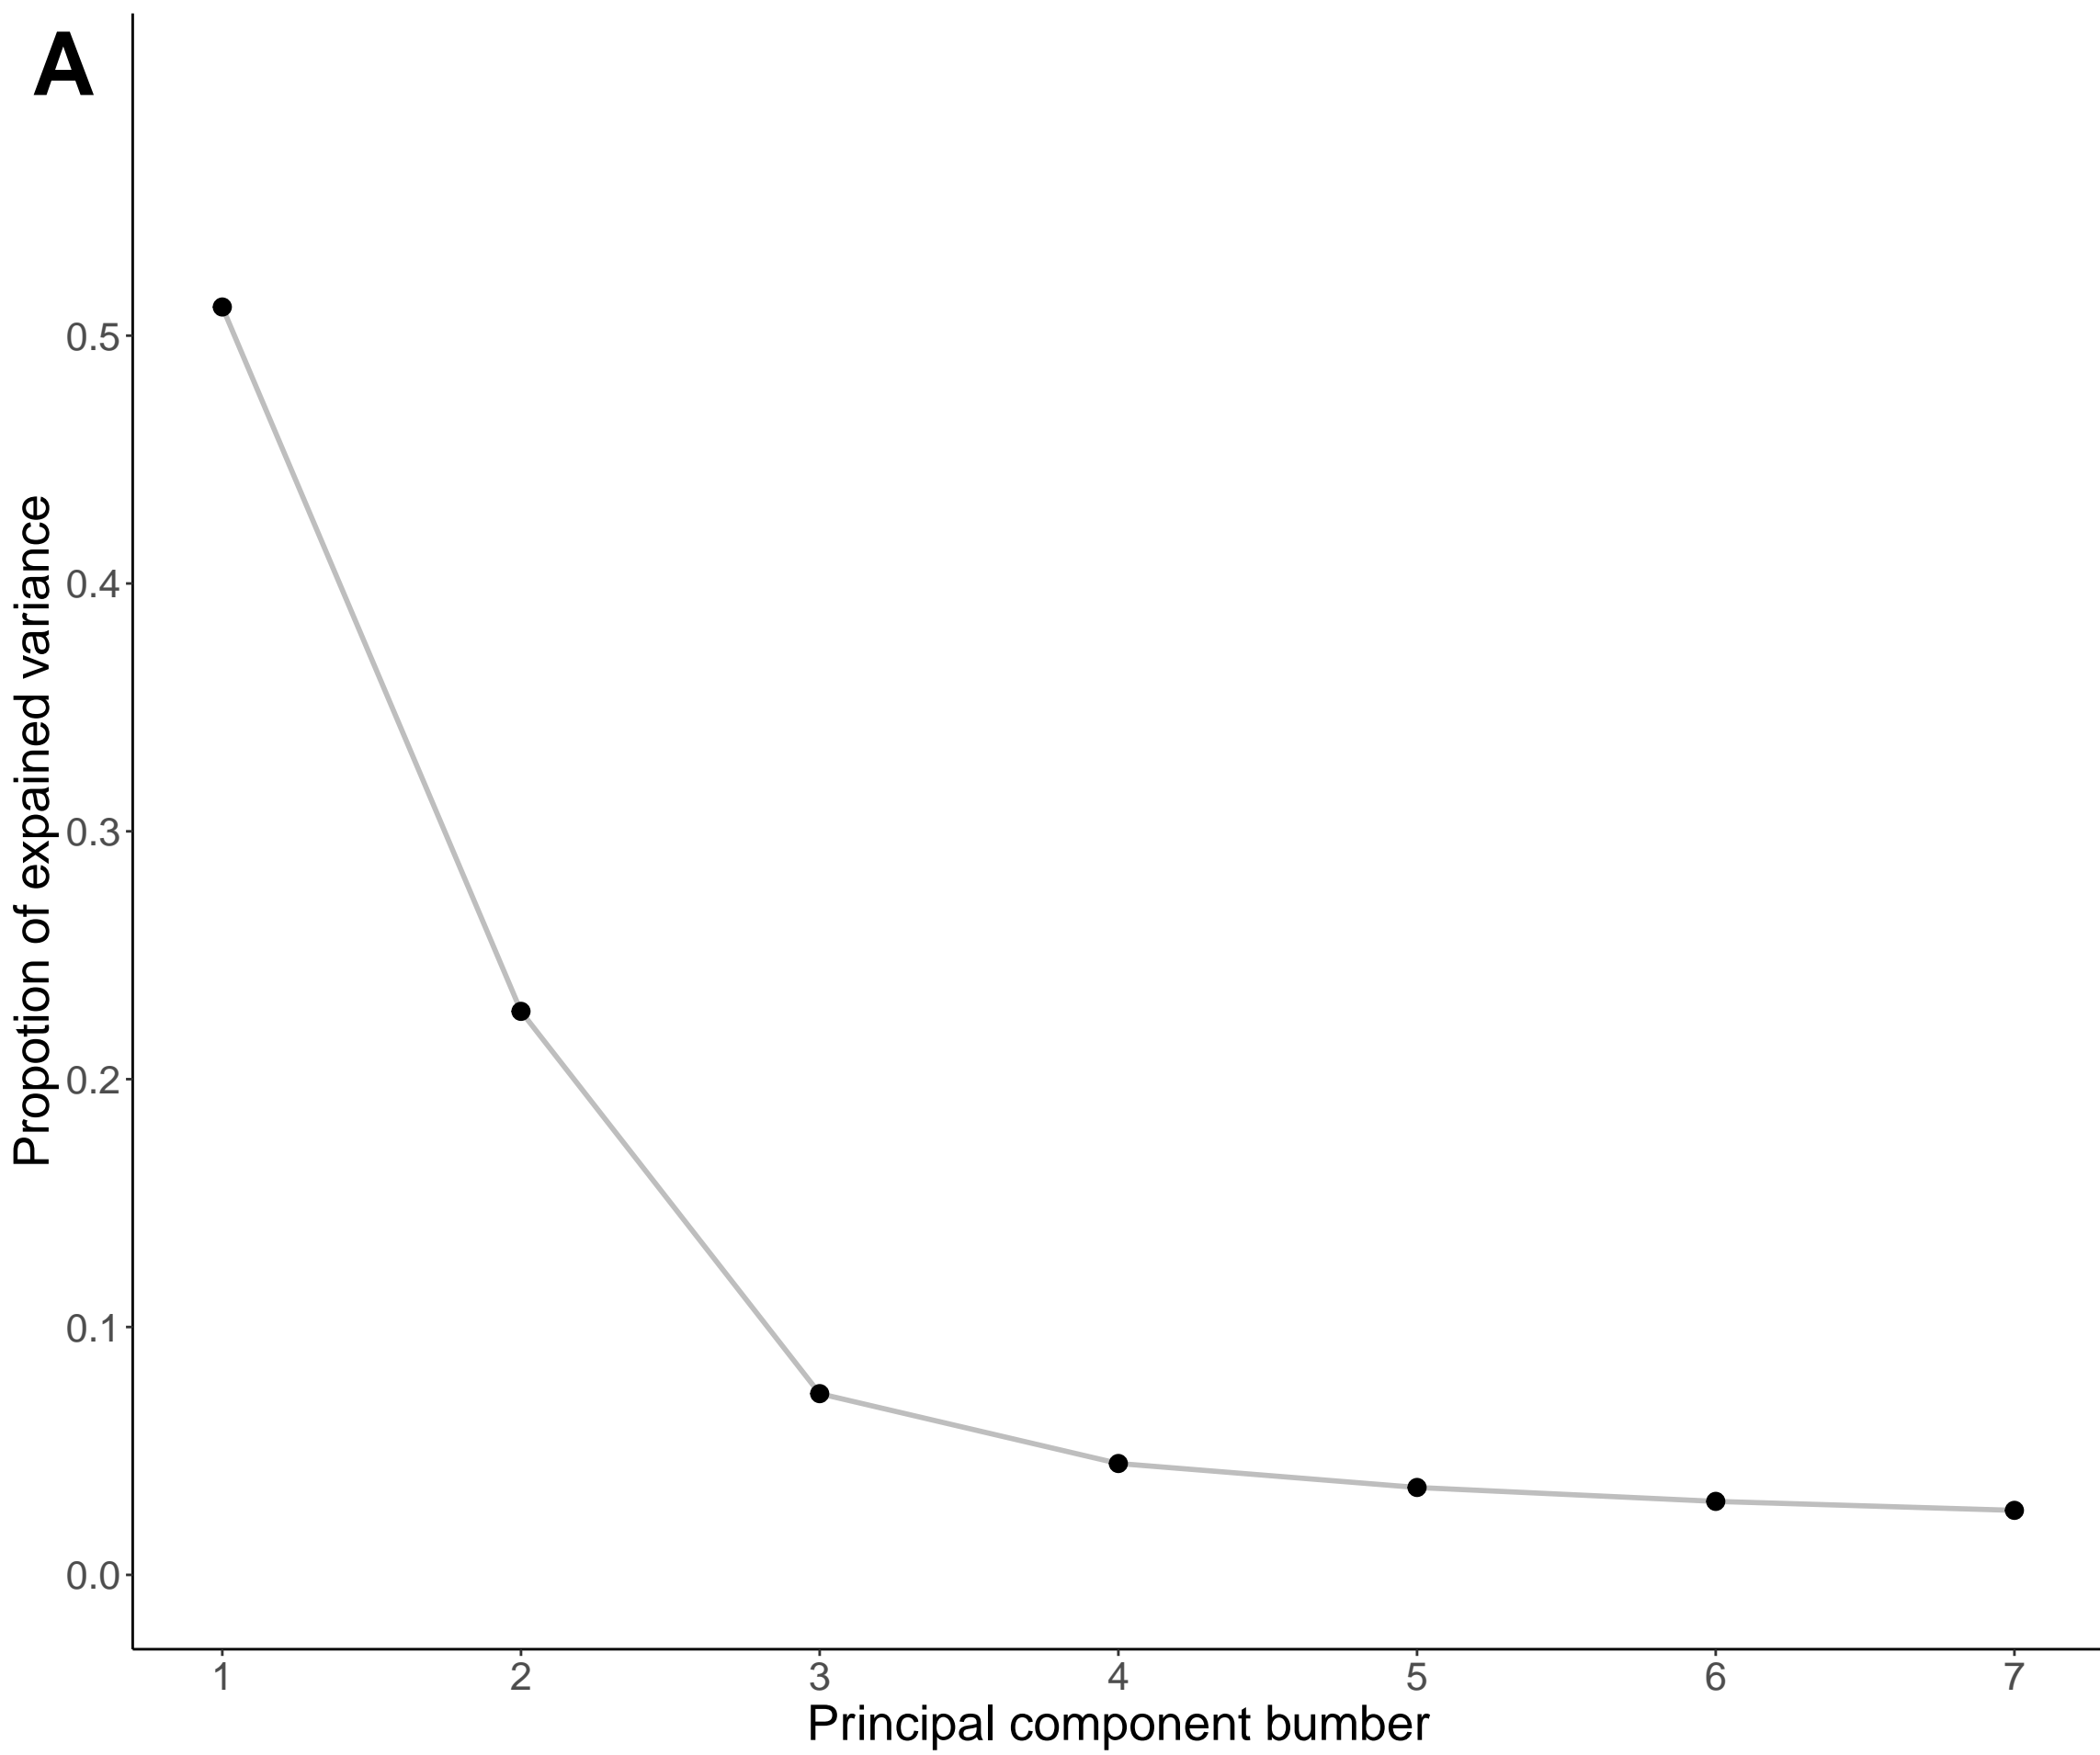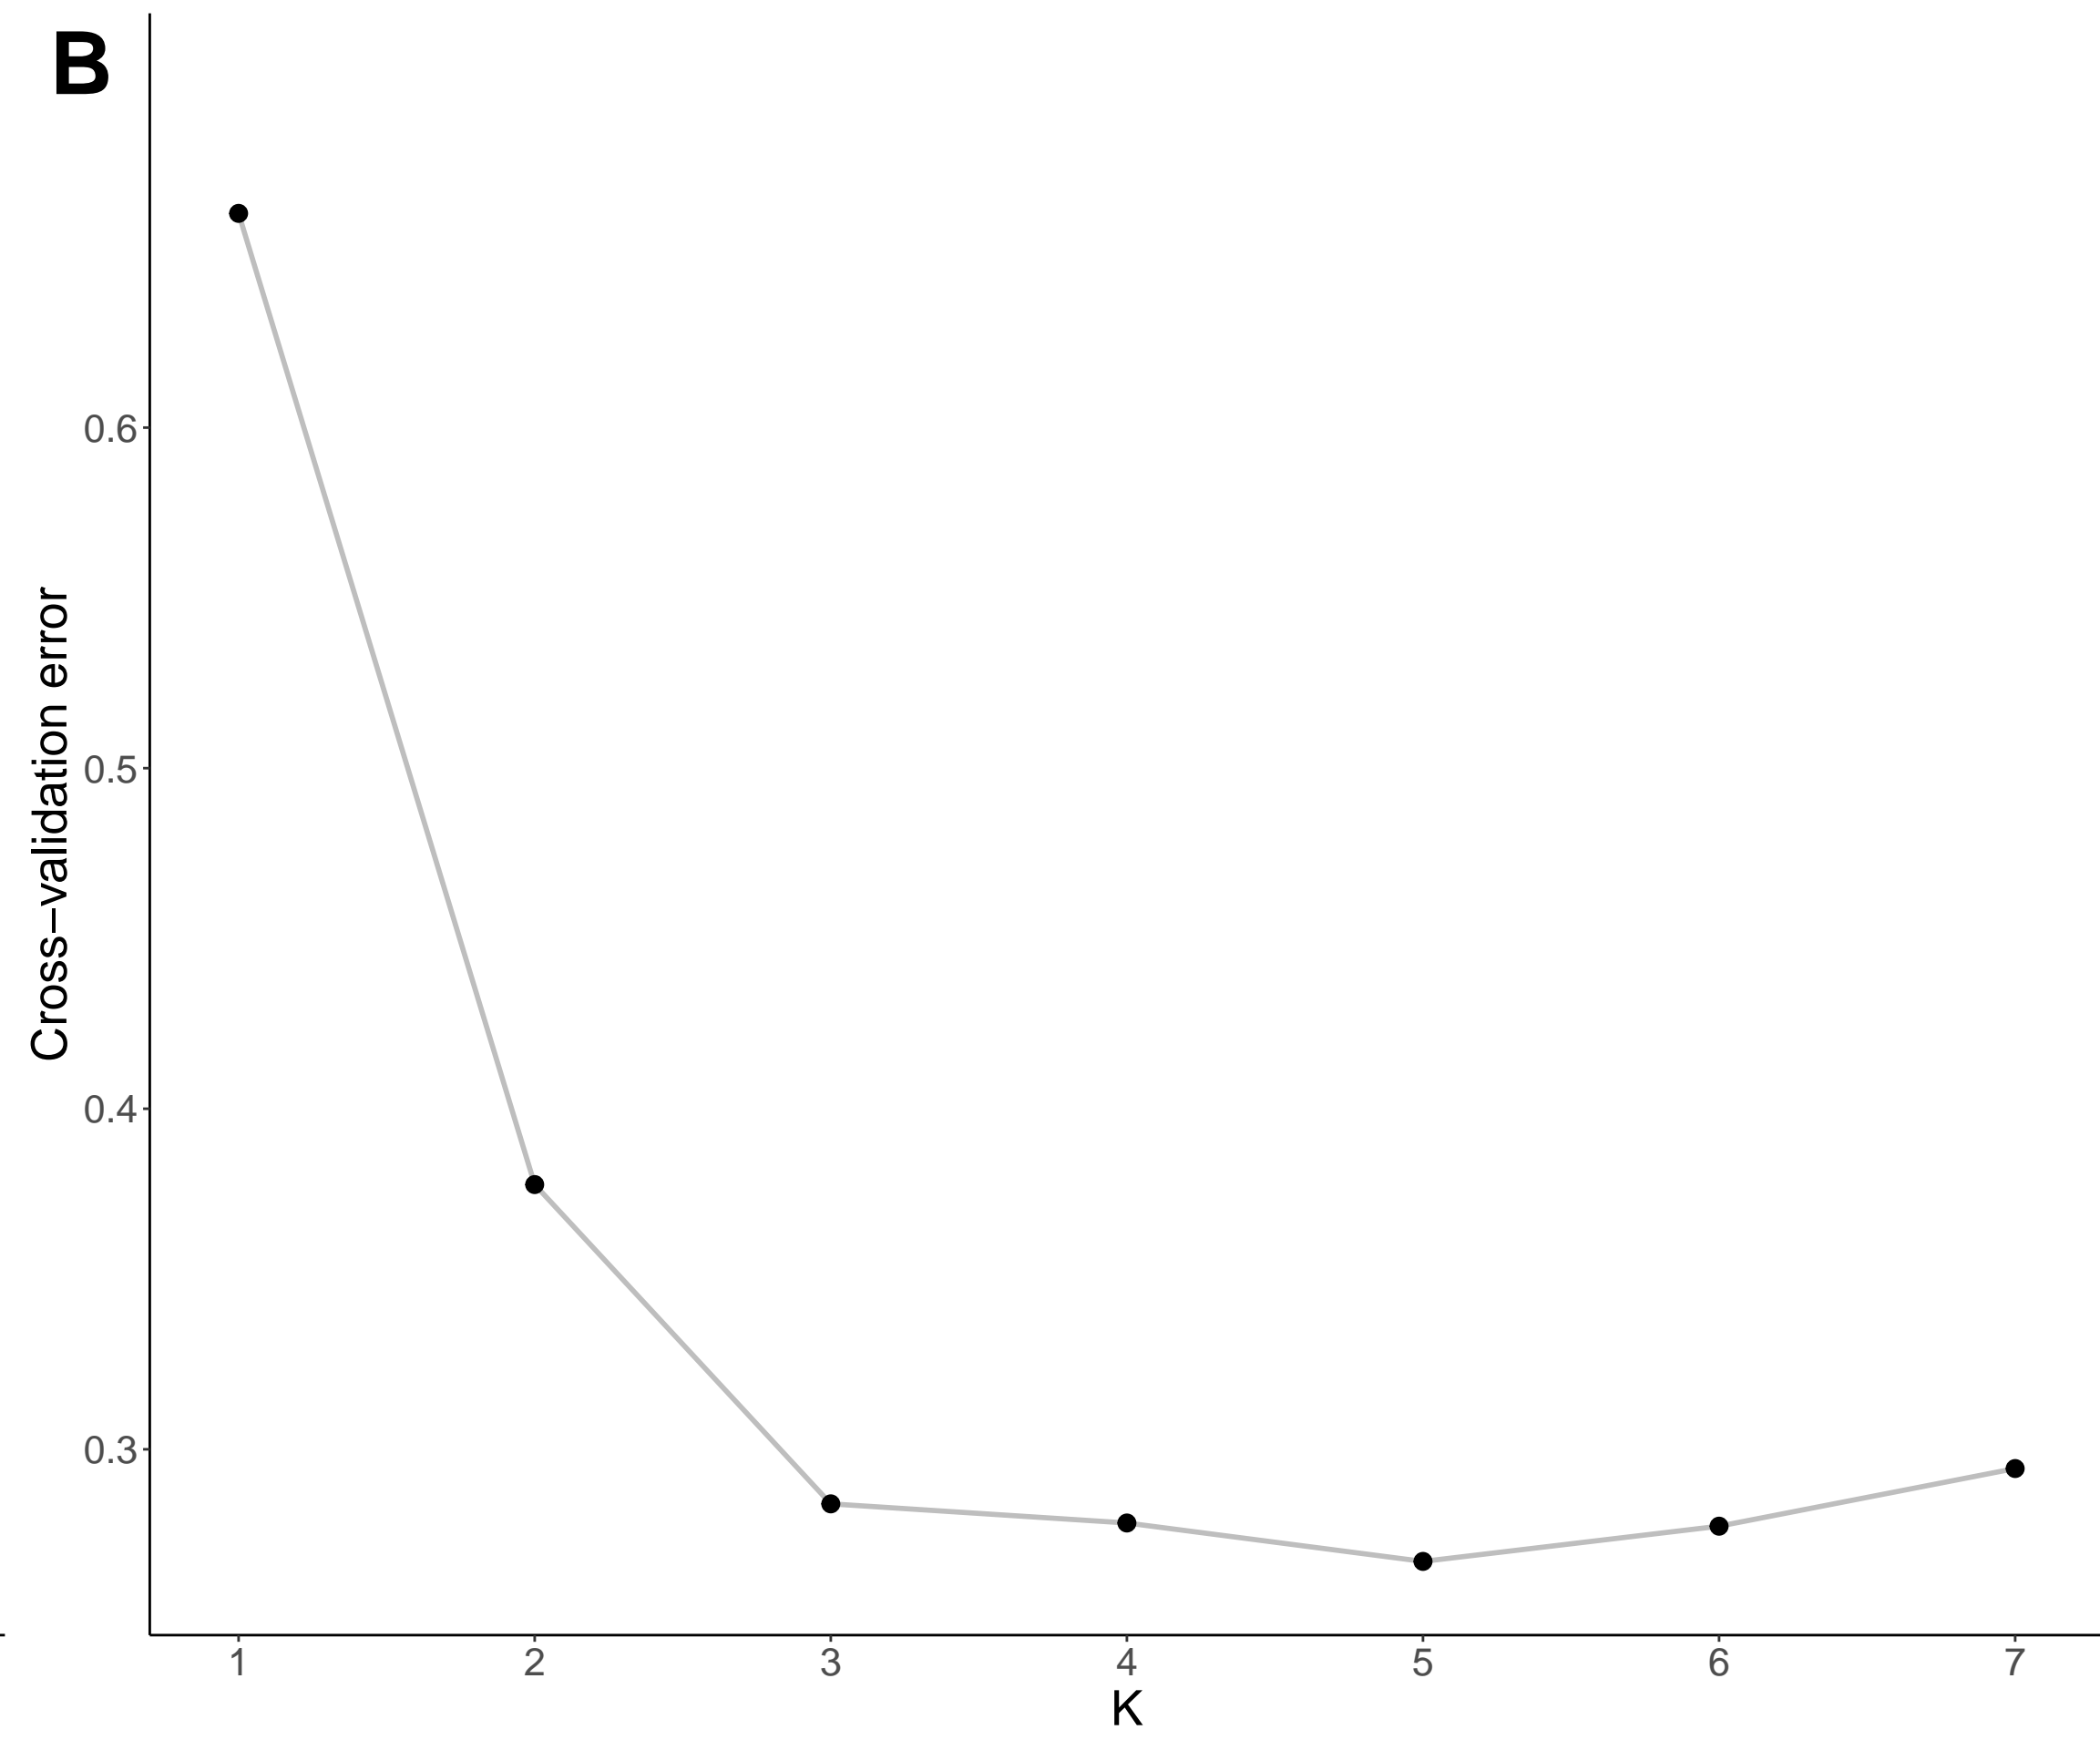

Supplement: Image_1.pdf [file Image_1.pdf]
