# Supplementary material for: Genome-wide data reveal bi-direction and asymmetrical hybridization origin of a fern species Microlepia matthewii
Source: Front Plant Sci. 2024 Jul 8;15:1392990. doi: 10.3389/fpls.2024.1392990 (PMC11260791; doi:10.3389/fpls.2024.1392990)
Supplement: Supplementary Table 1 — The NCBI accession number, taxon identification (Latin name), specimen voucher and Location for the samples in this study. [file Table_1.xlsx]

## Sheet: Sheet1
Sample No.	NCBI accession No.	Taxon	Specimen voucher	Location	population	longitude	latitude
BJZ042	SAMN40152217	M. marginata var. bipinnata	HJ Wei et al. BJZ042	Guangxi	pop17	26.27	110.72
CFH1224	SAMN40152218	M. marginata var. bipinnata	JJ Luo & H Wang CFH09001224	Zhejiang	pop24	28.53	118.56
CFH1227	SAMN40152219	M. marginata var. bipinnata	JJ Luo & H Wang CFH09001227	Zhejiang	pop24	28.53	118.56
CFH1229	SAMN40152220	M. marginata var. bipinnata	JJ Luo & H Wang CFH09001229	Zhejiang	pop24	28.53	118.56
CFH1231	SAMN40152221	M. marginata var. bipinnata	JJ Luo & H Wang CFH09001231	Zhejiang	pop24	28.53	118.56
GBJ2680	SAMN40152222	M. marginata var. bipinnata	BJ Ge et al. GBJ02680	Fujian	pop16	26.11	119.59
WYG281	SAMN40152223	M. marginata var. bipinnata	HJ Wei et al. WYG281	Guizhou	pop13	25.24	107.96
ZX04288	SAMN40152224	M. marginata var. bipinnata	YH Yan & H Wang ZX04288	Zhejiang	pop24	28.53	118.56
ZX04293	SAMN40152225	M. marginata var. bipinnata	YH Yan & H Wang ZX04293	Zhejiang	pop24	28.53	118.56
ZX04295	SAMN40152226	M. marginata var. bipinnata	YH Yan & H Wang ZX04295	Zhejiang	pop24	28.53	118.56
ZXL9964	SAMN40152227	M. marginata var. bipinnata	XL Zhou et al. ZXL09964	Guangdong	pop11	24.92	113.07
ZXL9984	SAMN40152228	M. marginata var. bipinnata	XL Zhou et al. ZXL09984	Guangdong	pop11	24.92	113.07
CFH1342	SAMN40152229	M. calvescens	JJ Luo & Morigengaowa CFH09001342	Guangxi	pop9	24.35	109.49
CFH1355	SAMN40152230	M. calvescens	JJ Luo & Morigengaowa CFH09001355	Guangxi	pop9	24.35	109.49
CFH1360	SAMN40152231	M. calvescens	JJ Luo & Morigengaowa CFH09001360	Guangxi	pop9	24.35	109.49
CFH1366	SAMN40152232	M. calvescens	JJ Luo & Morigengaowa CFH09001366	Guangxi	pop9	24.35	109.49
CFH1374	SAMN40152233	M. calvescens	JJ Luo & Morigengaowa CFH09001374	Guangxi	pop9	24.35	109.49
CFH1418	SAMN40152234	M. calvescens	JJ Luo & Morigengaowa CFH09001418	Guangxi	pop4	22.86	110.27
CFH1494	SAMN40152235	M. calvescens	JJ Luo & Morigengaowa CFH09001494	Guangdong	pop10	24.43	113.3
CFH1511	SAMN40152236	M. calvescens	JJ Luo & Morigengaowa CFH09001511	Guangdong	pop10	24.43	113.3
CFH1519	SAMN40152237	M. calvescens	JJ Luo & Morigengaowa CFH09001519	Guangdong	pop10	24.43	113.3
CFH1521	SAMN40152238	M. calvescens	JJ Luo & Morigengaowa CFH09001521	Guangdong	pop10	24.43	113.3
CFH1547	SAMN40152239	M. calvescens	JJ Luo & Morigengaowa CFH09001547	Guangdong	pop10	24.43	113.3
CFH1552	SAMN40152240	M. calvescens	JJ Luo & Morigengaowa CFH09001552	Guangdong	pop10	24.43	113.3
WYD052	SAMN40152241	M. calvescens	YH Yan et al. WYD052	Guangdong	pop7	23.17	112.54
YYH13692	SAMN40152242	M. calvescens	YH Yan & H Shang YYH13692	Guangdong	pop8	23.68	113.87
CFH1341	SAMN40152243	M. hancei	JJ Luo & Morigengaowa CFH09001341	Guangxi	pop9	24.35	109.49
CFH1350	SAMN40152244	M. hancei	JJ Luo & Morigengaowa CFH09001350	Guangxi	pop9	24.35	109.49
CFH1356	SAMN40152245	M. hancei	JJ Luo & Morigengaowa CFH09001356	Guangxi	pop9	24.35	109.49
CFH1362	SAMN40152246	M. hancei	JJ Luo & Morigengaowa CFH09001362	Guangxi	pop9	24.35	109.49
CFH1367	SAMN40152247	M. hancei	JJ Luo & Morigengaowa CFH09001367	Guangxi	pop9	24.35	109.49
CFH1371	SAMN40152248	M. hancei	JJ Luo & Morigengaowa CFH09001371	Guangxi	pop9	24.35	109.49
CFH1417	SAMN40152249	M. hancei	JJ Luo & Morigengaowa CFH09001417	Guangxi	pop4	22.86	110.27
CFH1476	SAMN40152250	M. hancei	JJ Luo & Morigengaowa CFH09001476	Guangdong	pop10	24.43	113.3
CFH1492	SAMN40152251	M. hancei	JJ Luo & Morigengaowa CFH09001492	Guangdong	pop10	24.43	113.3
CFH1509	SAMN40152252	M. hancei	JJ Luo & Morigengaowa CFH09001509	Guangdong	pop10	24.43	113.3
CFH1542	SAMN40152253	M. hancei	JJ Luo & Morigengaowa CFH09001542	Guangdong	pop10	24.43	113.3
GBJ2633	SAMN40152254	M. hancei	BJ Ge et al. GBJ02633	Fujian	pop16	26.11	119.59
HNS052	SAMN40152255	M. hancei	YH Yan HNS052	Hainan	pop1	19.95	110.58
SG258	SAMN40152256	M. hancei	H Shang & YF Gu SG272	Jiangxi	pop23	28.31	117.41
SG306	SAMN40152257	M. hancei	H Shang & YF Gu SG306	Jiangxi	pop22	28.09	116.96
WYG133	SAMN40152258	M. hancei	HJ Wei et al. WYG133	Guizhou	pop15	25.63	108.25
WYG320	SAMN40152259	M. hancei	HJ Wei et al. WYG320	Guizhou	pop14	25.32	106.61
YYH12335	SAMN40152260	M. hancei	YH Yan et al. YYH12335	Yunnan	pop5	22.91	104.81
YYH12416	SAMN40152261	M. hancei	YH Yan YYH12416	Guangdong	pop10	24.43	113.3
CFH1223	SAMN40152262	M. marginata	JJ Luo & H Wang CFH09001223	Zhejiang	pop24	28.53	118.56
CFH1225	SAMN40152263	M. marginata	JJ Luo & H Wang CFH09001225	Zhejiang	pop24	28.53	118.56
SG029	SAMN40152264	M. marginata	H Shang & YF Gu SG029	Fujian	pop12	25.23	116.82
SG083	SAMN40152265	M. marginata	H Shang & YF Gu SG083	Fujian	pop12	25.23	116.82
SG250	SAMN40152266	M. marginata	H Shang & YF Gu SG250	Jiangxi	pop25	28.9	118.07
SG318	SAMN40152267	M. marginata	H Shang & YF Gu SG318	Jiangxi	pop22	28.09	116.96
WLSQ688	SAMN40152268	M. marginata	HJ Wei & JB Zhang JSL-WLSQ 688	Hunan	pop27	29.68	109.76
WYG006	SAMN40152269	M. marginata	HJ Wei et al. WYG006	Guizhou	pop21	26.83	109.18
WYG107	SAMN40152270	M. marginata	HJ Wei et al. WYG107	Guizhou	pop15	25.63	108.25
WYG157	SAMN40152271	M. marginata	HJ Wei et al. WYG157	Guizhou	pop19	26.55	109.21
WYG194	SAMN40152272	M. marginata	HJ Wei et al. WYG194	Guizhou	pop13	25.24	107.96
WYG203	SAMN40152273	M. marginata	HJ Wei et al. WYG203	Guizhou	pop13	25.24	107.96
WYG270	SAMN40152274	M. marginata	HJ Wei et al. WYG270	Guizhou	pop13	25.24	107.96
YYH12368	SAMN40152275	M. marginata	YH Yan et al. YYH12368	Yunnan	pop6	23.14	104.81
YYH13543	SAMN40152276	M. marginata	HJ Wei & JB Zhang YYH13543	Guangxi	pop3	22.34	106.85
YYH13855	SAMN40152277	M. marginata	YH Yan & H Shang YYH13855	Sichuan	pop26	29.58	103.42
CFH1347	SAMN40152278	M. matthewii	JJ Luo & Morigengaowa CFH09001347	Guangxi	pop9	24.35	109.49
CFH1351	SAMN40152279	M. matthewii	JJ Luo & Morigengaowa CFH09001351	Guangxi	pop9	24.35	109.49
CFH1354	SAMN40152280	M. matthewii	JJ Luo & Morigengaowa CFH09001354	Guangxi	pop9	24.35	109.49
CFH1357	SAMN40152281	M. matthewii	JJ Luo & Morigengaowa CFH09001357	Guangxi	pop9	24.35	109.49
CFH1358	SAMN40152282	M. matthewii	JJ Luo & Morigengaowa CFH09001358	Guangxi	pop9	24.35	109.49
CFH1359	SAMN40152283	M. matthewii	JJ Luo & Morigengaowa CFH09001359	Guangxi	pop9	24.35	109.49
CFH1364	SAMN40152284	M. matthewii	JJ Luo & Morigengaowa CFH09001364	Guangxi	pop9	24.35	109.49
CFH1365	SAMN40152285	M. matthewii	JJ Luo & Morigengaowa CFH09001365	Guangxi	pop9	24.35	109.49
CFH1369	SAMN40152286	M. matthewii	JJ Luo & Morigengaowa CFH09001369	Guangxi	pop9	24.35	109.49
CFH1372	SAMN40152287	M. matthewii	JJ Luo & Morigengaowa CFH09001372	Guangxi	pop9	24.35	109.49
CFH1419	SAMN40152288	M. matthewii	JJ Luo & Morigengaowa CFH09001419	Guangxi	pop4	22.86	110.27
CFH1493	SAMN40152289	M. matthewii	JJ Luo & Morigengaowa CFH09001493	Guangdong	pop10	24.43	113.3
CFH1507	SAMN40152290	M. matthewii	JJ Luo & Morigengaowa CFH09001507	Guangdong	pop10	24.43	113.3
CFH1516	SAMN40152291	M. matthewii	JJ Luo & Morigengaowa CFH09001516	Guangdong	pop10	24.43	113.3
CFH1518	SAMN40152292	M. matthewii	JJ Luo & Morigengaowa CFH09001518	Guangdong	pop10	24.43	113.3
CFH1520	SAMN40152293	M. matthewii	JJ Luo & Morigengaowa CFH09001520	Guangdong	pop10	24.43	113.3
CFH1522	SAMN40152294	M. matthewii	JJ Luo & Morigengaowa CFH09001522	Guangdong	pop10	24.43	113.3
CFH1543	SAMN40152295	M. matthewii	JJ Luo & Morigengaowa CFH09001543	Guangdong	pop10	24.43	113.3
CFH1544	SAMN40152296	M. matthewii	JJ Luo & Morigengaowa CFH09001544	Guangdong	pop10	24.43	113.3
CFH1545	SAMN40152297	M. matthewii	JJ Luo & Morigengaowa CFH09001545	Guangdong	pop10	24.43	113.3
CFH1546	SAMN40152298	M. matthewii	JJ Luo & Morigengaowa CFH09001546	Guangdong	pop10	24.43	113.3
CFH1550	SAMN40152299	M. matthewii	JJ Luo & Morigengaowa CFH09001550	Guangdong	pop10	24.43	113.3
CFH1553	SAMN40152300	M. matthewii	JJ Luo & Morigengaowa CFH09001553	Guangdong	pop10	24.43	113.3
BJZ045	SAMN40152301	M. strigosa	HJ Wei et al. BJZ045	Guangxi	pop18	26.27	110.72
SG123	SAMN40152302	M. strigosa	H Shang & YF Gu SG123	Jiangxi	pop20	26.8	117.03
SG272	SAMN40152303	M. strigosa	H Shang & YF Gu SG258	Jiangxi	pop23	28.31	117.41
YYH12114	SAMN40152304	M. strigosa	YH Yan et al. YYH12114	Yunnan	pop2	21.92	101.27
